# Supplementary material for: Evaluating Strategies to Normalise Biological Replicates of Western Blot Data
Source: PubMed Central journal article supplement (PMC3903630; doi:10.1371/journal.pone.0087293), 2014-01-27
Supplement: pone.0087293.s009.pdf [file pone.0087293.s009.pdf]

## **Evaluating Strategies to Normalise Biological Replicates of Western Blot Data: Supporting Information S1**

Andrea Degasperi<sup>1,c</sup>, Marc R. Birtwistle<sup>2</sup>, Natalia Volinsky<sup>1</sup>, Jens Rauch<sup>1</sup>, Walter Kolch<sup>1,3,4</sup> and Boris N. Kholodenko<sup>1,3,4</sup>

<sup>1</sup>Systems Biology Ireland, University College Dublin, Dublin, Republic of Ireland

<sup>2</sup>Department of Pharmacology and Systems Therapeutics, Icahn School of Medicine at Mount Sinai, New York, New York, United States of America

<sup>3</sup>Conway Institute of Biomolecular & Biomedical Research, University College Dublin, Dublin, Republic of Ireland

<sup>4</sup>School of Medicine and Medical Science, University College Dublin, Dublin, Republic of Ireland

<sup>c</sup> Corresponding author, e-mail address: andrea.degasperi@ucd.ie

### **Data and statistical analysis of dilution experiments for BSA, ERK, RSK1 and mTOR**

BSA

| ECL<br>CCD imager | Raw optical densities |             |             | Data points tested for linearity | Regression lines of each replicate              |                      |                      | Coefficients of determination |                    |                    | R <sup>2</sup> = 1 if data is linear |                     |                   |                   |                     |
|-------------------|-----------------------|-------------|-------------|----------------------------------|-------------------------------------------------|----------------------|----------------------|-------------------------------|--------------------|--------------------|--------------------------------------|---------------------|-------------------|-------------------|---------------------|
|                   | dilution              | Replicate 1 | Replicate 2 |                                  | Replicate 3                                     | regression (1)       | regression (2)       | regression (3)                | R <sup>2</sup> (1) | R <sup>2</sup> (2) | R <sup>2</sup> (3)                   | R <sup>2</sup> mean | R <sup>2</sup> SD | R <sup>2</sup> CV | R <sup>2</sup> S.E. |
|                   | 100                   | 46777.668   | 64667.63    | 27749.22                         | full curve (10 samples)                         | y = 509.67x + 8403.8 | y = 660.85x + 10818  | y = 280.25x + 4200.1          | 0.7224             | 0.7973             | 0.843                                | 0.78756667          | 0.06088631        | 0.07730941        | 0.03515273          |
|                   | 50                    | 49021.96    | 58032.952   | 23294.078                        |                                                 |                      |                      |                               |                    |                    |                                      |                     |                   |                   |                     |
|                   | 25                    | 38426.605   | 41051.333   | 16621.602                        | first 8 visible samples (7 dilutions, 128 fold) | y = 1500.4x + 1918.3 | y = 1668.1x + 4305.6 | y = 657.37x + 1776.7          | 0.975              | 0.9038             | 0.9325                               | 0.9371              | 0.03582222        | 0.03822666        | 0.02068196          |
|                   | 12.5                  | 20257.664   | 31330.12    | 11945.288                        | first 7 visible samples (6 dilutions, 64 fold)  | y = 1678.8x + 1429.1 | y = 2551.1x + 1884.6 | y = 940.55x + 1000.3          | 0.9309             | 0.9595             | 0.9653                               | 0.9519              | 0.0184163         | 0.01934688        | 0.01063265          |
|                   | 6.25                  | 15424.744   | 21780.714   | 8128.146                         | first 6 visible samples (5 dilutions, 32 fold)  | y = 2518.5x + 66.499 | y = 3502.3x + 341    | y = 1256.6x + 487.34          | 0.995              | 0.9946             | 0.9913                               | 0.99363333          | 0.0020306         | 0.00204361        | 0.00117237          |
|                   | 3.125                 | 8705.652    | 11839.915   | 4715.418                         |                                                 |                      |                      |                               |                    |                    |                                      |                     |                   |                   |                     |
|                   | 1.5625                | 4071.489    | 6661.459    | 2774.518                         |                                                 |                      |                      |                               |                    |                    |                                      |                     |                   |                   |                     |
|                   | 0.78125               | 2048.719    | 3172.518    | 1409.376                         |                                                 |                      |                      |                               |                    |                    |                                      |                     |                   |                   |                     |
|                   | 0.390625              | 836.263     | 1117.749    | 986.406                          |                                                 |                      |                      |                               |                    |                    |                                      |                     |                   |                   |                     |
|                   | 0.1953125             | 301.364     | 568.607     | 372.849                          |                                                 |                      |                      |                               |                    |                    |                                      |                     |                   |                   |                     |

SD standard deviation  
CV coefficient of variation  
S.E. standard error

| ECL<br>Film | Raw optical densities |             |             | Data points tested for linearity | Regression lines of each replicate             |                      |                     | Coefficients of determination |                    |                    | R <sup>2</sup> = 1 if data is linear |                     |                   |                   |                     |
|-------------|-----------------------|-------------|-------------|----------------------------------|------------------------------------------------|----------------------|---------------------|-------------------------------|--------------------|--------------------|--------------------------------------|---------------------|-------------------|-------------------|---------------------|
|             | dilution              | Replicate 1 | Replicate 2 |                                  | Replicate 3                                    | regression (1)       | regression (2)      | regression (3)                | R <sup>2</sup> (1) | R <sup>2</sup> (2) | R <sup>2</sup> (3)                   | R <sup>2</sup> mean | R <sup>2</sup> SD | R <sup>2</sup> CV | R <sup>2</sup> S.E. |
|             | 100                   | 76565.496   | 72547.253   | 86640.792                        | full curve (9/10 samples)                      | y = 647.21x + 24084  | y = 606.55x + 24732 | y = 813.31x + 23136           | 0.7383             | 0.6765             | 0.7119                               | 0.7089              | 0.03100903        | 0.04374246        | 0.01790307          |
|             | 50                    | 69763.99    | 69398.505   | 83966.529                        |                                                |                      |                     |                               |                    |                    |                                      |                     |                   |                   |                     |
|             | 25                    | 56074.413   | 54337.927   | 63660.032                        |                                                |                      |                     |                               |                    |                    |                                      |                     |                   |                   |                     |
|             | 12.5                  | 42859.2     | 45855.957   | 50656.635                        | First 6 visible samples (5 dilutions, 32 fold) | y = 2808.7x + 12403  | y = 3134.2x + 11708 | y = 5822.4x + 6215.6          | 0.8119             | 0.8027             | 0.8763                               | 0.8303              | 0.04010187        | 0.04829805        | 0.02315283          |
|             | 6.25                  | 35900.3     | 37056.229   | 38397.907                        | First 4 visible samples (3 dilutions, 8 fold)  | y = 8029.7x + 4432.9 | y = 9504x + 2194.4  | y = 14064x - 250.31           | 0.9363             | 0.9459             | 0.9985                               | 0.96023333          | 0.03348572        | 0.03487248        | 0.01933299          |
|             | 3.125                 | 28059.229   | 30329.35    | 30335.492                        | First 3 visible samples (2 dilutions, 4 fold)  | y = 12589x + 766.54  | y = 14369x - 1718.4 | y = 14642x - 482.68           | 0.9863             | 0.983              | 0.9932                               | 0.9875              | 0.00520481        | 0.00527069        | 0.003005            |
|             | 1.5625                | 20102.087   | 20307.037   | 21632.057                        |                                                |                      |                     |                               |                    |                    |                                      |                     |                   |                   |                     |
|             | 0.78125               | 11603.702   | 10787.652   | 10820.116                        |                                                |                      |                     |                               |                    |                    |                                      |                     |                   |                   |                     |
|             | 0.390625              | 5015.731    | 3041.296    | 5645.853                         |                                                |                      |                     |                               |                    |                    |                                      |                     |                   |                   |                     |
|             | 0.1953125             |             |             | 2104.447                         |                                                |                      |                     |                               |                    |                    |                                      |                     |                   |                   |                     |

SD standard deviation  
CV coefficient of variation  
S.E. standard error

| LICOR | Raw optical densities |             |             | Data points tested for linearity | Regression lines of each replicate              |                      |                      | Coefficients of determination |                    |                    | R <sup>2</sup> = 1 if data is linear |                     |                   |                   |                     |
|-------|-----------------------|-------------|-------------|----------------------------------|-------------------------------------------------|----------------------|----------------------|-------------------------------|--------------------|--------------------|--------------------------------------|---------------------|-------------------|-------------------|---------------------|
|       | dilution              | Replicate 1 | Replicate 2 |                                  | Replicate 3                                     | regression (1)       | regression (2)       | regression (3)                | R <sup>2</sup> (1) | R <sup>2</sup> (2) | R <sup>2</sup> (3)                   | R <sup>2</sup> mean | R <sup>2</sup> SD | R <sup>2</sup> CV | R <sup>2</sup> S.E. |
|       | 100                   | 64398.718   | 69060.697   | 62198.082                        | full curve (8/9 samples)                        | y = 653.03x + 6627   | y = 675.31x + 8605.6 | y = 618.84x + 7224            | 0.9115             | 0.9126             | 0.9142                               | 0.91276667          | 0.00135769        | 0.00148745        | 0.00078387          |
|       | 50                    | 48644.262   | 50355.191   | 47313.262                        |                                                 |                      |                      |                               |                    |                    |                                      |                     |                   |                   |                     |
|       | 25                    | 31347.271   | 35981.806   | 30629.806                        |                                                 |                      |                      |                               |                    |                    |                                      |                     |                   |                   |                     |
|       | 12.5                  | 20985.179   | 22719.593   | 19069.179                        |                                                 |                      |                      |                               |                    |                    |                                      |                     |                   |                   |                     |
|       | 6.25                  | 13716.208   | 13050.551   | 12707.38                         | first 8 visible samples (7 dilutions, 128 fold) | y = 968.07x + 3645.8 | y = 675.31x + 8605.6 | y = 618.84x + 7224            | 0.9528             | 0.9126             | 0.9142                               | 0.92653333          | 0.02276166        | 0.02456648        | 0.01314145          |
|       | 3.125                 | 6645.51     | 7326.167    | 5174.146                         | first 7 visible samples (6 dilutions, 64 fold)  | y = 1271.4x + 1982.4 | y = 990.47x + 5149.2 | y = 926.62x + 3848.6          | 0.9515             | 0.9418             | 0.9629                               | 0.95206667          | 0.01056141        | 0.01109314        | 0.00609763          |
|       | 1.5625                | 2789.347    | 3445.832    | 2456.69                          | first 6 visible samples (5 dilutions, 32 fold)  | y = 1742.7x + 452.88 | y = 1410.8x + 2421.1 | y = 1205.6x + 2037.6          | 0.9731             | 0.9779             | 0.9679                               | 0.97296667          | 0.00500133        | 0.00514029        | 0.00288752          |
|       | 0.78125               | 971.163     | 1438.477    | 1527.82                          |                                                 |                      |                      |                               |                    |                    |                                      |                     |                   |                   |                     |
|       | 0.390625              | 496.678     |             |                                  |                                                 |                      |                      |                               |                    |                    |                                      |                     |                   |                   |                     |
|       | 0.1953125             |             |             |                                  |                                                 |                      |                      |                               |                    |                    |                                      |                     |                   |                   |                     |

SD standard deviation  
CV coefficient of variation  
S.E. standard error

|                   |           | Raw optical densities |             |             | Data points tested for linearity                | Regression lines of each replicate |                      |                      | Coefficients of determination |                    |                    | R <sup>2</sup> = 1 if data is linear |                     |                   |                   |                     |
|-------------------|-----------|-----------------------|-------------|-------------|-------------------------------------------------|------------------------------------|----------------------|----------------------|-------------------------------|--------------------|--------------------|--------------------------------------|---------------------|-------------------|-------------------|---------------------|
|                   |           | dilution              | Replicate 1 | Replicate 2 | Replicate 3                                     |                                    | regression (1)       | regression (2)       | regression (3)                | R <sup>2</sup> (1) | R <sup>2</sup> (2) | R <sup>2</sup> (3)                   | R <sup>2</sup> mean | R <sup>2</sup> SD | R <sup>2</sup> CV | R <sup>2</sup> S.E. |
| ECL<br>CCD imager | 100       | 15939.258             | 12679.744   | 14165.43    | full curve (9 samples)                          | y = 161.26x + 2202.8               | y = 125.59x + 3576.2 | y = 141.63x + 1586.1 | 0.8426                        | 0.5934             | 0.9117             | 0.78256667                           | 0.16742677          | 0.2139457         | 0.09666389        |                     |
|                   | 50        | 12793.945             | 13175.894   | 10430.945   | first 8 visible samples (7 dilutions, 128 fold) | y = 261.22x + 1256.9               | y = 270.14x + 2208.4 | y = 207.87x + 959.26 | 0.8996                        | 0.7963             | 0.9446             | 0.88016667                           | 0.07603593          | 0.08638811        | 0.04389937        |                     |
|                   | 25        | 9523.338              | 12260.066   | 7334.752    | first 7 visible samples (6 dilutions, 64 fold)  | y = 396.97x + 512.54               | y = 496.37x + 967.88 | y = 289.97x + 509.04 | 0.9452                        | 0.9439             | 0.9739             | 0.95433333                           | 0.01695769          | 0.01776915        | 0.00979053        |                     |
|                   | 12.5      | 7153.217              | 8883.752    | 4742.56     | first 6 visible samples (5 dilutions, 32 fold)  | y = 574.8x - 64.605                | y = 713.83x + 262.1  | y = 372.44x + 241.39 | 0.9991                        | 0.9905             | 0.9904             | 0.99333333                           | 0.00499433          | 0.00502785        | 0.00288348        |                     |
|                   | 6.25      | 3402.61               | 5256.267    | 2837.075    |                                                 |                                    |                      |                      |                               |                    |                    |                                      |                     |                   |                   |                     |
|                   | 3.125     | 1856.761              | 2730.417    | 1560.104    |                                                 |                                    |                      |                      |                               |                    |                    |                                      |                     |                   |                   |                     |
|                   | 1.5625    | 838.648               | 1320.447    | 741.598     |                                                 |                                    |                      |                      |                               |                    |                    |                                      |                     |                   |                   |                     |
|                   | 0.78125   | 355.557               | 676.577     | 459.213     |                                                 |                                    |                      |                      |                               |                    |                    |                                      |                     |                   |                   |                     |
|                   | 0.390625  | 151.071               | 272.142     | 273.314     |                                                 |                                    |                      |                      |                               |                    |                    |                                      |                     |                   |                   |                     |
|                   | 0.1953125 |                       |             |             |                                                 |                                    |                      |                      |                               |                    |                    |                                      |                     |                   |                   |                     |

SD standard deviation  
CV coefficient of variation  
S.E. standard error

|             |           | Raw optical densities |             |             | Data points tested for linearity               | Regression lines of each replicate |                      |                      | Coefficients of determination |                    |                    | R <sup>2</sup> = 1 if data is linear |                     |                   |                   |                     |
|-------------|-----------|-----------------------|-------------|-------------|------------------------------------------------|------------------------------------|----------------------|----------------------|-------------------------------|--------------------|--------------------|--------------------------------------|---------------------|-------------------|-------------------|---------------------|
|             |           | dilution              | Replicate 1 | Replicate 2 | Replicate 3                                    |                                    | regression (1)       | regression (2)       | regression (3)                | R <sup>2</sup> (1) | R <sup>2</sup> (2) | R <sup>2</sup> (3)                   | R <sup>2</sup> mean | R <sup>2</sup> SD | R <sup>2</sup> CV | R <sup>2</sup> S.E. |
| ECL<br>Film | 100       | 42141.492             | 36533.907   | 40090.614   | full curve (6/7 samples)                       | y = 369.02x + 11663                | y = 316.48x + 12460  | y = 363.69x + 9780.9 | 0.6866                        | 0.5896             | 0.7376             | 0.67126667                           | 0.075182            | 0.1120002         | 0.04340635        |                     |
|             | 50        | 37274.714             | 36398.028   | 35483.291   | First 3 visible samples (2 dilutions, 4 fold)  | y = 2129.3x - 5361.9               | y = 2537.1x - 2597.6 | y = 1713.6x - 3921   | 0.9969                        | 0.9999             | 1                  | 0.99893333                           | 0.00176163          | 0.00176351        | 0.00101708        |                     |
|             | 25        | 32720.12              | 32228.563   | 28991.534   | First 4 visible samples (3 dilutions, 8 fold)  | y = 1412.6x - 750.62               | y = 2138.6x - 1315.6 | y = 1244x - 899.69   | 0.9514                        | 0.9933             | 0.9731             | 0.9726                               | 0.02095447          | 0.0215448         | 0.01209807        |                     |
|             | 12.5      | 21470.543             | 24903.614   | 17497.735   | First 6 visible samples (5 dilutions, 32 fold) | y = 369.02x + 11663                | y = 685.1x + 7674.5  | y = 363.69x + 9780.9 | 0.6866                        | 0.7727             | 0.7376             | 0.7323                               | 0.04329399          | 0.05912057        | 0.0249958         |                     |
|             | 6.25      | 7299.066              | 13231.572   | 6792.288    |                                                |                                    |                      |                      |                               |                    |                    |                                      |                     |                   |                   |                     |
|             | 3.125     | 1723.861              | 5413.459    | 1431.719    |                                                |                                    |                      |                      |                               |                    |                    |                                      |                     |                   |                   |                     |
|             | 1.5625    |                       | 1311.426    |             |                                                |                                    |                      |                      |                               |                    |                    |                                      |                     |                   |                   |                     |
|             | 0.78125   |                       |             |             |                                                |                                    |                      |                      |                               |                    |                    |                                      |                     |                   |                   |                     |
|             | 0.390625  |                       |             |             |                                                |                                    |                      |                      |                               |                    |                    |                                      |                     |                   |                   |                     |
|             | 0.1953125 |                       |             |             |                                                |                                    |                      |                      |                               |                    |                    |                                      |                     |                   |                   |                     |

SD standard deviation  
CV coefficient of variation  
S.E. standard error

|       |           | Raw optical densities |             |             | Data points tested for linearity               | Regression lines of each replicate |                      |                      | Coefficients of determination |                    |                    | R <sup>2</sup> = 1 if data is linear |                     |                   |                   |                     |
|-------|-----------|-----------------------|-------------|-------------|------------------------------------------------|------------------------------------|----------------------|----------------------|-------------------------------|--------------------|--------------------|--------------------------------------|---------------------|-------------------|-------------------|---------------------|
|       |           | dilution              | Replicate 1 | Replicate 2 | Replicate 3                                    |                                    | regression (1)       | regression (2)       | regression (3)                | R <sup>2</sup> (1) | R <sup>2</sup> (2) | R <sup>2</sup> (3)                   | R <sup>2</sup> mean | R <sup>2</sup> SD | R <sup>2</sup> CV | R <sup>2</sup> S.E. |
| LICOR | 100       | 37868.668             | 43575.972   | 41042.923   | full curve (8 samples, 7 dilutions, 128 fold)  | y = 384.99x + 5032.3               | y = 398.23x + 8258.6 | y = 399.7x + 7273.8  | 0.8654                        | 0.8816             | 0.8533             | 0.86676667                           | 0.01419941          | 0.01638205        | 0.00819803        |                     |
|       | 50        | 31810.889             | 32572.709   | 35561.901   | first 7 visible samples (6 dilutions, 64 fold) | y = 637.2x + 2266.3                | y = 598.92x + 6057.6 | y = 675.91x + 4244.6 | 0.9586                        | 0.8991             | 0.9576             | 0.93843333                           | 0.03406734          | 0.03630235        | 0.01966879        |                     |
|       | 25        | 21405.413             | 25775.546   | 24647.224   | First 6 visible samples (5 dilutions, 32 fold) | y = 862.57x + 803.39               | y = 932.9x + 3889.8  | y = 917.12x + 2678.9 | 0.9823                        | 0.9592             | 0.9815             | 0.97433333                           | 0.01311195          | 0.01345736        | 0.00757019        |                     |
|       | 12.5      | 13153.543             | 18016.89    | 15543.191   |                                                |                                    |                      |                      |                               |                    |                    |                                      |                     |                   |                   |                     |
|       | 6.25      | 7133.086              | 10425.099   | 9566.078    |                                                |                                    |                      |                      |                               |                    |                    |                                      |                     |                   |                   |                     |
|       | 3.125     | 3620.631              | 7711.07     | 5943.007    |                                                |                                    |                      |                      |                               |                    |                    |                                      |                     |                   |                   |                     |
|       | 1.5625    | 1527.761              | 5244.463    | 3581.865    |                                                |                                    |                      |                      |                               |                    |                    |                                      |                     |                   |                   |                     |
|       | 0.78125   | 434.698               | 2081.66     | 1931.811    |                                                |                                    |                      |                      |                               |                    |                    |                                      |                     |                   |                   |                     |
|       | 0.390625  |                       |             |             |                                                |                                    |                      |                      |                               |                    |                    |                                      |                     |                   |                   |                     |
|       | 0.1953125 |                       |             |             |                                                |                                    |                      |                      |                               |                    |                    |                                      |                     |                   |                   |                     |

SD standard deviation  
CV coefficient of variation  
S.E. standard error

RSK1

SD standard deviation  
 CV coefficient of variation  
 S.E. standard error

| ECL<br>CCD imager | Raw optical densities |             |             | Data points tested for linearity | Regression lines of each replicate |                      |                      | Coefficients of determination |                    |                    | R <sup>2</sup> = 1 if data is linear |                     |                   |                   |                     |
|-------------------|-----------------------|-------------|-------------|----------------------------------|------------------------------------|----------------------|----------------------|-------------------------------|--------------------|--------------------|--------------------------------------|---------------------|-------------------|-------------------|---------------------|
|                   | dilution              | Replicate 1 | Replicate 2 |                                  | Replicate 3                        | regression (1)       | regression (2)       | regression (3)                | R <sup>2</sup> (1) | R <sup>2</sup> (2) | R <sup>2</sup> (3)                   | R <sup>2</sup> mean | R <sup>2</sup> SD | R <sup>2</sup> CV | R <sup>2</sup> S.E. |
|                   | 100                   | 7455.711    | 7866.104    | 7199.589                         | full curve (7 samples)             | y = 77.74x + 536.06  | y = 84.023x + 790.62 | y = 74.419x + 457.63          | 0.9164             | 0.8437             | 0.9366                               | 0.8989              | 0.048859902       | 0.054355214       | 0.028209277         |
|                   | 50                    | 5697.175    | 7005.64     | 5203.518                         | 6 samples (5 dilutions, 32 fold)   | y = 119.32x - 3.7254 | y = 148.6x - 47.73   | y = 108.48x + 15.398          | 0.9828             | 0.9777             | 0.9842                               | 0.981566667         | 0.003421013       | 0.003485258       | 0.001975123         |
|                   | 25                    | 3457.569    | 4463.397    | 3205.74                          | 5 samples (4 dilutions, 16 fold)   | y = 148.74x - 235.68 | y = 190.41x - 377.36 | y = 134.68x - 191.18          | 0.9963             | 0.9955             | 0.9988                               | 0.996866667         | 0.001721434       | 0.001726844       | 0.00099387          |
|                   | 12.5                  | 1731.255    | 1877.376    | 1438.719                         |                                    |                      |                      |                               |                    |                    |                                      |                     |                   |                   |                     |
|                   | 6.25                  | 575.456     | 704.82      | 631.355                          |                                    |                      |                      |                               |                    |                    |                                      |                     |                   |                   |                     |
|                   | 3.125                 | 207.607     | 209.435     | 215.021                          |                                    |                      |                      |                               |                    |                    |                                      |                     |                   |                   |                     |
|                   | 1.5625                | 54.121      | 80.95       | 76.95                            |                                    |                      |                      |                               |                    |                    |                                      |                     |                   |                   |                     |
|                   | 0.78125               |             |             |                                  |                                    |                      |                      |                               |                    |                    |                                      |                     |                   |                   |                     |
|                   | 0.390625              |             |             |                                  |                                    |                      |                      |                               |                    |                    |                                      |                     |                   |                   |                     |
|                   | 0.1953125             |             |             |                                  |                                    |                      |                      |                               |                    |                    |                                      |                     |                   |                   |                     |

SD standard deviation  
 CV coefficient of variation  
 S.E. standard error

| ECL<br>Film | Raw optical densities |             |             | Data points tested for linearity | Regression lines of each replicate            |                      |                      | Coefficients of determination |                    |                    | R <sup>2</sup> = 1 if data is linear |                     |                   |                   |                     |
|-------------|-----------------------|-------------|-------------|----------------------------------|-----------------------------------------------|----------------------|----------------------|-------------------------------|--------------------|--------------------|--------------------------------------|---------------------|-------------------|-------------------|---------------------|
|             | dilution              | Replicate 1 | Replicate 2 |                                  | Replicate 3                                   | regression (1)       | regression (2)       | regression (3)                | R <sup>2</sup> (1) | R <sup>2</sup> (2) | R <sup>2</sup> (3)                   | R <sup>2</sup> mean | R <sup>2</sup> SD | R <sup>2</sup> CV | R <sup>2</sup> S.E. |
|             | 100                   | 50217.099   | 44657.229   | 40941.673                        | 6 samples (5 dilutions, 32 fold)              | y = 418.37x + 16060  | y = 339.32x + 16343  | y = 296.86x + 16071           | 0.6923             | 0.7192             | 0.7254                               | 0.7123              | 0.017595738       | 0.024702707       | 0.010158904         |
|             | 50                    | 46673.836   | 40040.844   | 36701.894                        | First 4 visible samples (3 dilutions, 8 fold) | y = 1511.6x + 2746.2 | y = 1188x + 6119.7   | y = 1021.6x + 7334.3          | 0.9346             | 0.9308             | 0.922                                | 0.929133333         | 0.006463229       | 0.006956191       | 0.003731547         |
|             | 25                    | 38217.593   | 34165.451   | 31259.238                        | First 3 visible samples (2 dilutions, 4 fold) | y = 2412.1x - 3047.5 | y = 1830.7x + 1984.5 | y = 1649x + 3297.5            | 0.9972             | 0.9562             | 0.9736                               | 0.975666667         | 0.020577982       | 0.021091201       | 0.011880703         |
|             | 12.5                  | 26873.643   | 24161.43    | 23420.359                        |                                               |                      |                      |                               |                    |                    |                                      |                     |                   |                   |                     |
|             | 6.25                  | 12716.702   | 15547.752   | 15073.752                        |                                               |                      |                      |                               |                    |                    |                                      |                     |                   |                   |                     |
|             | 3.125                 | 4030.933    | 6291.368    | 7470.782                         |                                               |                      |                      |                               |                    |                    |                                      |                     |                   |                   |                     |
|             | 1.5625                |             |             |                                  |                                               |                      |                      |                               |                    |                    |                                      |                     |                   |                   |                     |
|             | 0.78125               |             |             |                                  |                                               |                      |                      |                               |                    |                    |                                      |                     |                   |                   |                     |
|             | 0.390625              |             |             |                                  |                                               |                      |                      |                               |                    |                    |                                      |                     |                   |                   |                     |
|             | 0.1953125             |             |             |                                  |                                               |                      |                      |                               |                    |                    |                                      |                     |                   |                   |                     |

mTOR

SD standard deviation  
CV coefficient of variation  
S.E. standard error

| ECL<br>CCD imager | Raw optical densities |             |             | Data points tested for linearity | Regression lines of each replicate |                      |                      | Coefficients of determination |                    |                    | R <sup>2</sup> = 1 if data is linear |                     |                   |                   |                     |
|-------------------|-----------------------|-------------|-------------|----------------------------------|------------------------------------|----------------------|----------------------|-------------------------------|--------------------|--------------------|--------------------------------------|---------------------|-------------------|-------------------|---------------------|
|                   | dilution              | Replicate 1 | Replicate 2 |                                  | Replicate 3                        | regression (1)       | regression (2)       | regression (3)                | R <sup>2</sup> (1) | R <sup>2</sup> (2) | R <sup>2</sup> (3)                   | R <sup>2</sup> mean | R <sup>2</sup> SD | R <sup>2</sup> CV | R <sup>2</sup> S.E. |
|                   | 100                   | 5766.933    | 6245.175    | 5377.569                         | full curve (7 samples)             | y = 63.733x + 307.64 | y = 64.037x + 1292.5 | y = 55.061x + 821.98          | 0.8766             | 0.6663             | 0.8091                               | 0.784               | 0.10737332        | 0.13695577        | 0.06199202          |
|                   | 50                    | 5174.104    | 6197.468    | 5090.69                          | 6 samples (5 dilutions, 32 fold)   | y = 108.22x - 269.87 | y = 134.66x + 375.69 | y = 101.32x + 221.42          | 0.9983             | 0.8664             | 0.9574                               | 0.9407              | 0.06751718        | 0.07177334        | 0.03898106          |
|                   | 25                    | 2416.669    | 5456.933    | 2842.376                         | 5 samples (4 dilutions, 16 fold)   | y = 104.55x - 240.95 | y = 235.79x - 421.69 | y = 123.17x + 49.172          | 0.993              | 0.9955             | 0.907                                | 0.96516667          | 0.05038932        | 0.05220789        | 0.02909229          |
|                   | 12.5                  | 1018.355    | 2662.79     | 2241.962                         |                                    |                      |                      |                               |                    |                    |                                      |                     |                   |                   |                     |
|                   | 6.25                  | 302.092     | 811.406     | 782.82                           |                                    |                      |                      |                               |                    |                    |                                      |                     |                   |                   |                     |
|                   | 3.125                 | 92.192      | 316.92      | 259.385                          |                                    |                      |                      |                               |                    |                    |                                      |                     |                   |                   |                     |
|                   | 1.5625                | 30.121      | 64.364      | 85.192                           |                                    |                      |                      |                               |                    |                    |                                      |                     |                   |                   |                     |
|                   | 0.78125               |             |             |                                  |                                    |                      |                      |                               |                    |                    |                                      |                     |                   |                   |                     |
|                   | 0.390625              |             |             |                                  |                                    |                      |                      |                               |                    |                    |                                      |                     |                   |                   |                     |
|                   | 0.1953125             |             |             |                                  |                                    |                      |                      |                               |                    |                    |                                      |                     |                   |                   |                     |

SD standard deviation  
CV coefficient of variation  
S.E. standard error

| ECL<br>Film | Raw optical densities |             |             | Data points tested for linearity | Regression lines of each replicate             |                      |                      | Coefficients of determination |                    |                    | R <sup>2</sup> = 1 if data is linear |                     |                   |                   |                     |
|-------------|-----------------------|-------------|-------------|----------------------------------|------------------------------------------------|----------------------|----------------------|-------------------------------|--------------------|--------------------|--------------------------------------|---------------------|-------------------|-------------------|---------------------|
|             | dilution              | Replicate 1 | Replicate 2 |                                  | Replicate 3                                    | regression (1)       | regression (2)       | regression (3)                | R <sup>2</sup> (1) | R <sup>2</sup> (2) | R <sup>2</sup> (3)                   | R <sup>2</sup> mean | R <sup>2</sup> SD | R <sup>2</sup> CV | R <sup>2</sup> S.E. |
|             | 100                   | 19216.551   | 27271.108   | 27337.673                        | First 6 visible samples (5 dilutions, 32 fold) | y = 188.29x + 3812.2 | y = 533.74x + 4469.4 | y = 262.31x + 5518.6          | 0.7473             | 0.7975             | 0.7576                               | 0.76746667          | 0.02651459        | 0.03454819        | 0.0153082           |
|             | 50                    | 18756.137   | 27083.037   | 24934.309                        | First 5 visible samples (4 dilutions, 16 fold) | y = 378.29x + 815.9  | y = 985.76x + 905.16 | y = 507.09x + 1658.3          | 0.9293             | 0.9214             | 0.9015                               | 0.9174              | 0.01432515        | 0.01561495        | 0.00827063          |
|             | 25                    | 11253.288   | 23475.622   | 17494.51                         | First 4 visible samples (3 dilutions, 8 fold)  | y = 511.1x - 496.95  | y = 1551.2x - 1889.5 | y = 790.49x - 1143.2          | 0.8835             | 0.9867             | 0.9317                               | 0.93396667          | 0.05163733        | 0.05528819        | 0.02981282          |
|             | 12.5                  | 8581.267    | 17013.359   | 11809.146                        | First 3 visible samples (2 dilutions, 4 fold)  | y = 910.21x - 3064.8 | y = 1929.6x - 3106.7 | y = 1227.5x - 3954.7          | 0.974              | 0.9921             | 0.9652                               | 0.9771              | 0.01371532        | 0.01403676        | 0.00791854          |
|             | 6.25                  | 1818.79     | 9108.167    | 2455.912                         |                                                |                      |                      |                               |                    |                    |                                      |                     |                   |                   |                     |
|             | 3.125                 | 316.435     | 2457.811    | 721.941                          |                                                |                      |                      |                               |                    |                    |                                      |                     |                   |                   |                     |
|             | 1.5625                |             | 218.435     |                                  |                                                |                      |                      |                               |                    |                    |                                      |                     |                   |                   |                     |
|             | 0.78125               |             |             |                                  |                                                |                      |                      |                               |                    |                    |                                      |                     |                   |                   |                     |
|             | 0.390625              |             |             |                                  |                                                |                      |                      |                               |                    |                    |                                      |                     |                   |                   |                     |
|             | 0.1953125             |             |             |                                  |                                                |                      |                      |                               |                    |                    |                                      |                     |                   |                   |                     |
